# Supplementary material for: Attenuation of Pseudomonas aeruginosa Virulence by Pomegranate Peel Extract
Source: MDPI journal article supplement (doi:10.3390/microorganisms10122500), 2022-12-16
Supplement: s1 [file s1]

**Table S1:** Peak areas of phenolic compounds in PomeGr exposed or not to *P. aeruginosa*.

| <i>Compound</i>                      | <i>PomeGr</i><br><i>peak area (AUP)</i>     | <i>P. aeruginosa</i><br><i>peak area (AUP)</i> | (%)<br><i>Decrease</i> |
|--------------------------------------|---------------------------------------------|------------------------------------------------|------------------------|
| Galloyl-hexoside isomer 1            | 7.82x10 <sup>6</sup> ± 2.71x10 <sup>5</sup> | 7.57x10 <sup>6</sup> ± 4.24x10 <sup>5</sup>    | 3.2                    |
| HHDP-hexoside isomer 1               | 3.23x10 <sup>7</sup> ± 1.94x10 <sup>6</sup> | 3.18x10 <sup>7</sup> ± 2.39x10 <sup>6</sup>    | 1.5                    |
| Citric acid                          | 3.29x10 <sup>9</sup> ± 1.50x10 <sup>8</sup> | 3.21x10 <sup>9</sup> ± 2.04x10 <sup>8</sup>    | 2.4                    |
| HHDP-hexoside isomer 2               | 8.47x10 <sup>7</sup> ± 1.98x10 <sup>6</sup> | 6.46x10 <sup>7</sup> ± 1.76x10 <sup>6</sup>    | 23.7                   |
| Galloyl-hexoside isomer 2            | 1.35x10 <sup>7</sup> ± 2.03x10 <sup>6</sup> | 1.54x10 <sup>7</sup> ± 5.52x10 <sup>5</sup>    | 14.1*                  |
| Galloyl-hexoside isomer 3            | 1.02x10 <sup>7</sup> ± 3.40x10 <sup>5</sup> | 1.00x10 <sup>7</sup> ± 5.94x10 <sup>5</sup>    | 2.0                    |
| Pedunculagin isomer 1                | 7.43x10 <sup>6</sup> ± 1.61x10 <sup>5</sup> | 8.59x10 <sup>5</sup> ± 1.58x10 <sup>5</sup>    | 88.4                   |
| Gallic acid                          | 5.55x10 <sup>7</sup> ± 2.61x10 <sup>6</sup> | 5.20x10 <sup>7</sup> ± 5.83x10 <sup>6</sup>    | 6.3                    |
| Galloyl-hexoside isomer 4            | 1.29x10 <sup>7</sup> ± 3.59x10 <sup>5</sup> | 1.26x10 <sup>7</sup> ± 1.10x10 <sup>5</sup>    | 2.3                    |
| Galloyl-HHDP-hexoside isomer 1       | 1.39x10 <sup>7</sup> ± 1.68x10 <sup>6</sup> | 1.20x10 <sup>7</sup> ± 3.35x10 <sup>5</sup>    | 13.7                   |
| Digalloyl-hexoside isomer 1          | 1.09x10 <sup>7</sup> ± 7.88x10 <sup>5</sup> | 1.05x10 <sup>7</sup> ± 2.99x10 <sup>5</sup>    | 3.7                    |
| Punicalin                            | 6.48x10 <sup>7</sup> ± 2.40x10 <sup>6</sup> | 5.11x10 <sup>7</sup> ± 5.00x10 <sup>6</sup>    | 21.1                   |
| Pedunculagin isomer 2                | 9.07x10 <sup>6</sup> ± 9.81x10 <sup>4</sup> | 3.75x10 <sup>6</sup> ± 3.39x10 <sup>5</sup>    | 58.7                   |
| Galloyl-HHDP-hexoside isomer 2       | 1.25x10 <sup>7</sup> ± 1.42x10 <sup>6</sup> | 8.88x10 <sup>6</sup> ± 4.25x10 <sup>5</sup>    | 29.0                   |
| Punicalagin isomer 1                 | 3.70x10 <sup>7</sup> ± 1.23x10 <sup>6</sup> | 2.44x10 <sup>7</sup> ± 4.16x10 <sup>5</sup>    | 34.1                   |
| Digalloyl-hexoside isomer 2          | 8.31x10 <sup>6</sup> ± 8.94x10 <sup>4</sup> | 8.25x10 <sup>6</sup> ± 2.86x10 <sup>5</sup>    | 0.7                    |
| Granatin isomer 1                    | 2.44x10 <sup>6</sup> ± 8.26x10 <sup>4</sup> | 2.34x10 <sup>4</sup> ± 1.77x10 <sup>3</sup>    | 99.6                   |
| Di-(HHDP-galloyl-hexoside)-pentoside | 5.56x10 <sup>6</sup> ± 2.70x10 <sup>5</sup> | 9.76x10 <sup>5</sup> ± 4.56x10 <sup>4</sup>    | 82.4                   |
| Granatin isomer 2                    | 1.47x10 <sup>6</sup> ± 7.41x10 <sup>4</sup> | 7.59x10 <sup>4</sup> ± 3.10x10 <sup>3</sup>    | 94.8                   |
| Punicalagin isomer 2                 | 3.61x10 <sup>7</sup> ± 1.02x10 <sup>6</sup> | 1.01x10 <sup>7</sup> ± 4.07x10 <sup>5</sup>    | 72.0                   |
| Punicalagin isomer 3                 | 8.04x10 <sup>7</sup> ± 8.61x10 <sup>5</sup> | 5.46x10 <sup>7</sup> ± 7.67x10 <sup>5</sup>    | 32.1                   |
| Brevifolin carboxylic acid           | 9.55x10 <sup>7</sup> ± 2.09x10 <sup>6</sup> | 9.47x10 <sup>7</sup> ± 3.44x10 <sup>6</sup>    | 0.8                    |
| Galloyl-HHDP-hexoside isomer 3       | 9.39x10 <sup>7</sup> ± 2.93x10 <sup>6</sup> | 7.57x10 <sup>7</sup> ± 2.31x10 <sup>6</sup>    | 19.4                   |
| Ellagic acid -hexoside               | 1.93x10 <sup>7</sup> ± 3.28x10 <sup>5</sup> | 1.95x10 <sup>7</sup> ± 5.88x10 <sup>5</sup>    | n.d.                   |
| Ellagic acid                         | 4.08x10 <sup>7</sup> ± 2.64x10 <sup>6</sup> | 3.95x10 <sup>7</sup> ± 1.64x10 <sup>6</sup>    | 3.2                    |
| Ellagic acid-deoxyhexoside           | 5.21x10 <sup>6</sup> ± 1.51x10 <sup>5</sup> | 5.02x10 <sup>6</sup> ± 2.34x10 <sup>5</sup>    | 3.6                    |

HHDP: hexahydroxydiphenoyl.

The relative amounts were expressed as the AUP (area under the peak) arbitrary units measured from the extracted ion chromatograms (EIC) obtained for each compound (tolerance ± 5 ppm).

n.d. non determined.

The asterisk indicates increase rather than decrease.

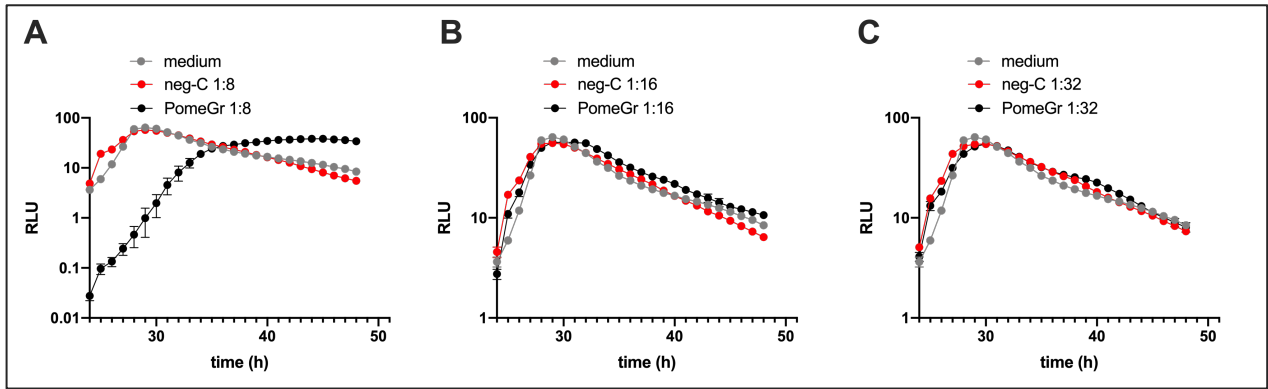

**Figure S1: Kinetic of microbial regrowth.** Twenty-four hours after exposure of *Pseudomonas* to PomeGr, neg-C or medium, the supernatants were removed and fresh medium was added to each well. The plate was further incubated at 37°C and the microbial regrowth was measured every hour (from 24 to 48 h). Panel A, 1:8 dilution; Panel B, 1:16 dilution; Panel C, 1:32 dilution. The results were expressed as mean  $\pm$  SEM of the RLU of 9-12 replicates of three independent experiments.
